# Supplementary material for: Impaired Ventilation Is Not Independently Associated With 28-day Mortality in COVID-19 ARDS
Source: Research Square preprint supplement (doi:10.21203/rs.3.rs-150970/v1), 2021-01-21
Supplement: Supplementary file 2 [file 3879b676f7ef5926647c47e8.docx]

| **Table 1 - Baseline Characteristics of the Patients According to 28-Day Mortality** | | | | |
| --- | --- | --- | --- | --- |
|  | **All Patients**  **(*n* = 927)** | **Non-Survivors**  **(*n* = 266)** | **Survivors**  **(*n* = 661)** | ***p* value** |
| Age, years | 65.0 (57.0 – 72.0) | 70.0 (64.0 – 75.0) | 63.0 (55.0 – 70.0) | < 0.001 |
| Male gender – no (%) | 668 (72.1) | 206 (77.4) | 462 (69.9) | 0.023 |
| Body mass index, kg/m2 | 27.8 (25.3 – 30.8) | 27.7 (25.2 – 29.8) | 27.8 (25.4 – 30.9) | 0.227 |
| Transferred under invasive ventilation | 80 (8.6) | 16 (6.0) | 64 (9.7) | 0.092 |
| Days between intubation and admission | 0.0 (0.0 – 0.0) | 0.0 (0.0 – 0.0) | 0.0 (0.0 – 0.0) | 0.249 |
| Use of non-invasive ventilation – no (%) | 79 / 869 (9.1) | 21 / 251 (8.4) | 58 / 618 (9.4) | 0.697 |
| Duration of non-invasive ventilation, hours | 8.0 (2.0 – 17.4) | 4.0 (1.2 – 8.5) | 8.0 (2.0 – 24.0) | 0.112 |
| Chest CT scan performed – no (%) | 316 / 913 (34.6) | 101 / 264 (38.3) | 215 / 649 (33.1) | 0.145 |
| Lung parenchyma affected – no (%) |  |  |  | 0.659 |
| 0% | 13 / 320 (4.1) | 3 / 102 (2.9) | 10 / 218 (4.6) |  |
| 25% | 103 / 320 (32.2) | 31 / 102 (30.4) | 72 / 218 (33.0) |  |
| 50% | 95 / 320 (29.7) | 33 / 102 (32.4) | 62 / 218 (28.4) |  |
| 75% | 91 / 320 (28.4) | 27 / 102 (26.5) | 64 / 218 (29.4) |  |
| 100% | 18 / 320 (5.6) | 8 / 102 (7.8) | 10 / 218 (4.6) |  |
| Chest X-ray performed – no (%) | 526 / 595 (88.4) | 139 / 161 (86.3) | 387 / 434 (89.2) | 0.387 |
| Quadrants affected – no (%) |  |  |  | 0.286 |
| 1 | 40 / 525 (7.6) | 10 / 142 (7.0) | 30 / 383 (7.8) |  |
| 2 | 125 / 525 (23.8) | 28 / 142 (19.7) | 97 / 383 (25.3) |  |
| 3 | 147 / 525 (28.0) | 48 / 142 (33.8) | 99 / 383 (25.8) |  |
| 4 | 213 / 525 (40.6) | 56 / 142 (39.4) | 157 / 383 (41.0) |  |
| Severity of ARDS – no (%) |  |  |  | 0.020 |
| Mild | 186 / 921 (20.2) | 45 (17.0) | 141 (21.5) |  |
| Moderate | 638 / 921 (69.3) | 180 (68.2) | 458 (69.7) |  |
| Severe | 97 / 921 (10.5) | 39 (14.8) | 58 (8.8) |  |
| Co-existing disorders – no (%) |  |  |  |  |
| Hypertension | 317 (34.2) | 112 (42.1) | 205 (31.0) | 0.002 |
| Heart failure | 39 (4.2) | 16 (6.0) | 23 (3.5) | 0.102 |
| Diabetes | 207 (22.3) | 78 (29.3) | 129 (19.5) | 0.002 |
| Chronic kidney disease | 41 (4.4) | 16 (6.0) | 25 (3.8) | 0.157 |
| Baseline creatinine, µmol/L* | 76.0 (62.0 – 97.0) | 84.0 (65.0 – 112.0) | 74.0 (61.0 – 92.0) | < 0.001 |
| Liver cirrhosis | 3 (0.3) | 0 (0.0) | 3 (0.5) | 0.562 |
| Chronic obstructive pulmonary disease | 76 (8.2) | 32 (12.0) | 44 (6.7) | 0.011 |
| Active hematological neoplasia | 15 (1.6) | 6 (2.3) | 9 (1.4) | 0.388 |
| Active solid neoplasia | 23 (2.5) | 9 (3.4) | 14 (2.1) | 0.253 |
| Neuromuscular disease | 8 (0.9) | 3 (1.1) | 5 (0.8) | 0.696 |
| Immunosuppression | 24 (2.6) | 7 (2.6) | 17 (2.6) | 0.999 |
| Previous medication – no (%) |  |  |  |  |
| Systemic steroids | 35 (3.8) | 17 (6.4) | 18 (2.7) | 0.012 |
| Inhalation steroids | 108 (11.7) | 40 (15.0) | 68 (10.3) | 0.054 |
| Angiotensin converting enzyme inhibitor | 160 (17.3) | 55 (20.7) | 105 (15.9) | 0.084 |
| Angiotensin II receptor blocker | 101 (10.9) | 35 (13.2) | 66 (10.0) | 0.164 |
| Beta-blockers | 180 (19.4) | 65 (24.4) | 115 (17.4) | 0.017 |
| Insulin | 62 (6.7) | 22 (8.3) | 40 (6.1) | 0.245 |
| Metformin | 150 (16.2) | 55 (20.7) | 95 (14.4) | 0.023 |
| Statins | 277 (29.9) | 104 (39.1) | 173 (26.2) | < 0.001 |
| Calcium channel blockers | 167 (18.0) | 51 (19.2) | 116 (17.5) | 0.571 |
| Vital signs |  |  |  |  |
| Heart rate, bpm | 84.3 (73.7 – 97.0) | 85.0 (74.5 – 100.3) | 84.0 (73.5 – 96.0) | 0.092 |
| Mean arterial pressure, mmHg | 80.3 (73.7 – 88.0) | 80.0 (73.0 – 86.0) | 80.5 (74.8 – 88.3) | 0.061 |
| Organ support – no (%) |  |  |  |  |
| Continuous sedation | 892 (96.4) | 252 (95.1) | 640 (97.0) | 0.173 |
| Inotropic or vasopressor | 733 (79.2) | 216 (81.5) | 517 (78.3) | 0.324 |
| Vasopressor | 732 (79.1) | 216 (81.5) | 516 (78.2) | 0.283 |
| Inotropic | 41 (4.4) | 17 (6.4) | 24 (3.6) | 0.077 |
| Fluid balance, mL | 631.5 (50.0 – 1428.2) | 753.6 (100.0 – 1482.0) | 593.0 (34.0 – 1390.0) | 0.143 |
| Urine output, mL | 702.5 (370.0 – 1143.8) | 570.0 (280.0 – 1075.0) | 725.0 (415.0 – 1165.0) | 0.001 |
| Data are median (quartile 25% - quartile 75%) or No (%). Percentages may not total 100 because of rounding  *CT: computed tomography; PEEP positive end expiratory pressure*  * Most recent measurement in 24 hours before intubation, or at ICU admission under invasive ventilation | | | | |
